# Supplementary material for: Molecular Tracing of SARS-CoV-2 in Italy in the First Three Months of the Epidemic
Source: Preprints.org preprint supplement (doi:10.20944/preprints202007.0144.v1), 2020-07-08
Supplement: Supplementary file 1 [file supplementary]

Table S2. Accession IDs, sampling dates and location of sequences included in the dataset.

| **Accession ID** | **Sampling date** | **Location** |
| --- | --- | --- |
| EPI_ISL_413570 | 2020-02-28 | NL |
| EPI_ISL_426883 | 2020-03-27 | CZ |
| EPI_ISL_426884 | 2020-03-27 | CZ |
| EPI_ISL_426888 | 2020-03-31 | CZ |
| EPI_ISL_426889 | 2020-04-02 | CZ |
| EPI_ISL_426890 | 2020-03-26 | CZ |
| EPI_ISL_426892 | 2020-03-27 | CZ |
| EPI_ISL_426896 | 2020-03-28 | CZ |
| EPI_ISL_426897 | 2020-03-29 | CZ |
| EPI_ISL_436201 | 2020-03-18 | ES |
| EPI_ISL_436208 | 2020-03-22 | ES |
| EPI_ISL_436217 | 2020-03-13 | ES |
| EPI_ISL_424342 | 2020-03-07 | IT |
| EPI_ISL_424343 | 2020-03-23 | IT |
| EPI_ISL_424344 | 2020-03-04 | IT |
| EPI_ISL_424366 | 2020-03-17 | TR |
| EPI_ISL_424378 | 2020-03-19 | IS |
| EPI_ISL_436339 | 2020-03-28 | ES |
| EPI_ISL_436386 | 2020-03-17 | ES |
| EPI_ISL_413603 | 2020-03-03 | FI |
| EPI_ISL_413604 | 2020-03-03 | FI |
| EPI_ISL_413647 | 2020-03-01 | PT |
| EPI_ISL_436368 | 2020-03-25 | ES |
| EPI_ISL_436372 | 2020-03-16 | ES |
| EPI_ISL_436379 | 2020-03-18 | ES |
| EPI_ISL_436396 | 2020-03-22 | ES |
| EPI_ISL_437308 | 2020-03-25 | TR |
| EPI_ISL_437309 | 2020-03-26 | TR |
| EPI_ISL_437312 | 2020-03-25 | TR |
| EPI_ISL_437325 | 2020-03-19 | TR |
| EPI_ISL_437327 | 2020-03-19 | TR |
| EPI_ISL_403928 | 2020-01-01 | CN |
| EPI_ISL_403929 | 2019-12-30 | CN |
| EPI_ISL_403930 | 2019-12-30 | CN |
| EPI_ISL_403931 | 2019-12-30 | CN |
| EPI_ISL_414631 | 2020-03-04 | FR |
| EPI_ISL_437301 | 2020-04-17 | AT |
| EPI_ISL_437302 | 2020-04-17 | AT |
| EPI_ISL_437303 | 2020-04-17 | AT |
| EPI_ISL_437332 | 2020-03-18 | TR |
| EPI_ISL_413489 | 2020-03-03 | IT |
| EPI_ISL_414625 | 2020-02-26 | FR |
| EPI_ISL_414638 | 2020-03-04 | FR |
| EPI_ISL_414642 | 2020-03-08 | FI |
| EPI_ISL_414643 | 2020-03-07 | FI |
| EPI_ISL_425464 | 2020-03-11 | GB |
| EPI_ISL_437435 | 2020-04-04 | RS |
| EPI_ISL_424703 | 2020-03-15 | SE |
| EPI_ISL_413997 | 2020-02-26 | CH |
| EPI_ISL_413999 | 2020-02-27 | CH |
| EPI_ISL_424638 | 2020-04-03 | BE |
| EPI_ISL_434010 | 2020-04-14 | GB |
| EPI_ISL_435409 | 2020-03-25 | HU |
| EPI_ISL_422156 | 2020-03-28 | GB |
| EPI_ISL_435406 | 2020-03-22 | HU |
| EPI_ISL_435411 | 2020-03-27 | HU |
| EPI_ISL_435412 | 2020-03-30 | HU |
| EPI_ISL_435413 | 2020-03-30 | HU |
| EPI_ISL_435414 | 2020-03-30 | HU |
| EPI_ISL_435415 | 2020-03-30 | HU |
| EPI_ISL_435416 | 2020-03-27 | HU |
| EPI_ISL_435417 | 2020-03-30 | HU |
| EPI_ISL_435419 | 2020-03-20 | HU |
| EPI_ISL_435420 | 2020-03-23 | HU |
| EPI_ISL_435421 | 2020-03-25 | HU |
| EPI_ISL_435429 | 2020-03-28 | HU |
| EPI_ISL_435431 | 2020-03-25 | HU |
| EPI_ISL_436716 | 2020-04-14 | RU |
| EPI_ISL_436718 | 2020-03-19 | IT |
| EPI_ISL_436719 | 2020-03-20 | IT |
| EPI_ISL_436720 | 2020-03-20 | IT |
| EPI_ISL_436721 | 2020-03-20 | IT |
| EPI_ISL_436722 | 2020-03-20 | IT |
| EPI_ISL_436723 | 2020-03-20 | IT |
| EPI_ISL_436724 | 2020-03-21 | IT |
| EPI_ISL_436725 | 2020-04-27 | IT |
| EPI_ISL_436726 | 2020-04-27 | IT |
| EPI_ISL_436727 | 2020-04-27 | IT |
| EPI_ISL_436728 | 2020-04-27 | IT |
| EPI_ISL_436729 | 2020-04-27 | IT |
| EPI_ISL_436730 | 2020-04-27 | IT |
| EPI_ISL_436731 | 2020-04-26 | IT |
| EPI_ISL_436732 | 2020-04-27 | IT |
| EPI_ISL_424491 | 2020-03-20 | IS |
| EPI_ISL_435145 | 2020-03-24 | IT |
| EPI_ISL_435146 | 2020-04-07 | IT |
| EPI_ISL_435147 | 2020-04-08 | IT |
| EPI_ISL_435148 | 2020-04-08 | IT |
| EPI_ISL_435149 | 2020-04-08 | IT |
| EPI_ISL_435150 | 2020-04-08 | IT |
| EPI_ISL_435151 | 2020-04-08 | IT |
| EPI_ISL_435152 | 2020-04-09 | IT |
| EPI_ISL_435153 | 2020-04-09 | IT |
| EPI_ISL_435154 | 2020-04-09 | IT |
| EPI_ISL_435155 | 2020-04-09 | IT |
| EPI_ISL_424415 | 2020-03-19 | IS |
| EPI_ISL_424434 | 2020-03-19 | IS |
| EPI_ISL_424586 | 2020-03-27 | IS |
| EPI_ISL_424606 | 2020-03-28 | IS |
| EPI_ISL_424556 | 2020-03-29 | IS |
| EPI_ISL_414020 | 2020-02-27 | CH |
| EPI_ISL_426051 | 2020-03-20 | CZ |
| EPI_ISL_427356 | 2020-04-06 | BE |
| EPI_ISL_427367 | 2020-04-07 | BE |
| EPI_ISL_428681 | 2020-03-11 | ES |
| EPI_ISL_428684 | 2020-03-27 | ES |
| EPI_ISL_417963 | 2020-03-12 | ES |
| EPI_ISL_417997 | 2020-03-07 | PT |
| EPI_ISL_427318 | 2020-04-03 | RU |
| EPI_ISL_402129 | 2019-12-30 | CN |
| EPI_ISL_402130 | 2019-12-30 | CN |
| EPI_ISL_402132 | 2019-12-30 | CN |
| EPI_ISL_415481 | 2020-03-08 | NL |
| EPI_ISL_415485 | 2020-03-12 | NL |
| EPI_ISL_415489 | 2020-03-13 | NL |
| EPI_ISL_416751 | 2020-03-05 | FR |
| EPI_ISL_416754 | 2020-03-06 | FR |
| EPI_ISL_417921 | 2020-03-01 | IT |
| EPI_ISL_417922 | 2020-02-28 | IT |
| EPI_ISL_417923 | 2020-03-04 | IT |
| EPI_ISL_428712 | 2020-03-17 | TR |
| EPI_ISL_428714 | 2020-03-18 | TR |
| EPI_ISL_428715 | 2020-03-18 | TR |
| EPI_ISL_428718 | 2020-03-19 | TR |
| EPI_ISL_428719 | 2020-03-21 | TR |
| EPI_ISL_428720 | 2020-03-21 | TR |
| EPI_ISL_428721 | 2020-03-21 | TR |
| EPI_ISL_429968 | 2020-02-21 | FR |
| EPI_ISL_402119 | 2019-12-30 | CN |
| EPI_ISL_402120 | 2020-01-01 | CN |
| EPI_ISL_402121 | 2019-12-30 | CN |
| EPI_ISL_402123 | 2019-12-24 | CN |
| EPI_ISL_415454 | 2020-02-28 | CN |
| EPI_ISL_415457 | 2020-02-29 | CN |
| EPI_ISL_417785 | 2020-03-12 | IS |
| EPI_ISL_429771 | 2020-03-23 | LU |
| EPI_ISL_429774 | 2020-03-23 | LU |
| EPI_ISL_429777 | 2020-03-24 | LU |
| EPI_ISL_415156 | 2020-03-01 | BE |
| EPI_ISL_415159 | 2020-02-29 | BE |
| EPI_ISL_416483 | 2020-02-26 | ES |
| EPI_ISL_416487 | 2020-03-04 | ES |
| EPI_ISL_416488 | 2020-03-03 | PL |
| EPI_ISL_417704 | 2020-03-10 | IS |
| EPI_ISL_417747 | 2020-03-11 | IS |
| EPI_ISL_417791 | 2020-03-12 | IS |
| EPI_ISL_429767 | 2020-03-25 | LU |
| EPI_ISL_429799 | 2020-03-30 | LU |
| EPI_ISL_416426 | 2020-03-17 | HU |
| EPI_ISL_417733 | 2020-03-16 | IS |
| EPI_ISL_417765 | 2020-02-27 | IS |
| EPI_ISL_429731 | 2020-03-31 | LU |
| EPI_ISL_429736 | 2020-03-29 | LU |
| EPI_ISL_429871 | 2020-03-23 | TR |
| EPI_ISL_430852 | 2020-03-11 | SE |
| EPI_ISL_416507 | 2020-03-05 | FR |
| EPI_ISL_417829 | 2020-03-16 | IS |
| EPI_ISL_417834 | 2020-03-16 | IS |
| EPI_ISL_417836 | 2020-03-16 | IS |
| EPI_ISL_417877 | 2020-03-06 | SK |
| EPI_ISL_417878 | 2020-03-07 | SK |
| EPI_ISL_417879 | 2020-03-06 | SK |
| EPI_ISL_417880 | 2020-03-08 | SK |
| EPI_ISL_429863 | 2020-03-22 | TR |
| EPI_ISL_429864 | 2020-03-22 | TR |
| EPI_ISL_429867 | 2020-03-17 | TR |
| EPI_ISL_430847 | 2020-02-27 | SE |
| EPI_ISL_430848 | 2020-03-11 | SE |
| EPI_ISL_430849 | 2020-03-11 | SE |
| EPI_ISL_414441 | 2020-03-03 | NL |
| EPI_ISL_414471 | 2020-03-05 | NL |
| EPI_ISL_414477 | 2020-03-01 | CZ |
| EPI_ISL_437199 | 2020-03-31 | AT |
| EPI_ISL_414468 | 2020-03-06 | NL |
| EPI_ISL_415703 | 2020-03-01 | CH |
| EPI_ISL_415704 | 2020-03-04 | CH |
| EPI_ISL_415707 | 2020-03-08 | CH |
| EPI_ISL_425130 | 2020-03-21 | DE |
| EPI_ISL_425139 | 2020-03-19 | DE |
| EPI_ISL_425140 | 2020-03-20 | DE |
| EPI_ISL_437273 | 2020-03-30 | DE |
| EPI_ISL_437286 | 2020-04-02 | DE |
| EPI_ISL_414505 | 2020-02-27 | DE |
| EPI_ISL_414584 | 2020-03-02 | IE |
| EPI_ISL_414585 | 2020-03-03 | IE |
| EPI_ISL_414586 | 2020-03-03 | IE |
| EPI_ISL_414587 | 2020-03-03 | IE |
| EPI_ISL_425223 | 2020-03-17 | ES |
| EPI_ISL_425228 | 2020-03-22 | CZ |
| EPI_ISL_437203 | 2020-04-06 | AT |
| EPI_ISL_437210 | 2020-03-07 | DE |
| EPI_ISL_437211 | 2020-03-12 | DE |
| EPI_ISL_437218 | 2020-03-12 | DE |
| EPI_ISL_437221 | 2020-04-06 | DE |
| EPI_ISL_437227 | 2020-04-13 | DE |
| EPI_ISL_437231 | 2020-03-25 | DE |
| EPI_ISL_437236 | 2020-03-22 | DE |
| EPI_ISL_437237 | 2020-03-23 | DE |
| EPI_ISL_437238 | 2020-03-24 | DE |
| EPI_ISL_437243 | 2020-04-11 | DE |
| EPI_ISL_415525 | 2020-03-12 | NL |
| EPI_ISL_426285 | 2020-03-30 | LV |
| EPI_ISL_426286 | 2020-03-30 | LV |
| EPI_ISL_426287 | 2020-03-30 | LV |
| EPI_ISL_426288 | 2020-03-30 | LV |
| EPI_ISL_426289 | 2020-03-30 | LV |
| EPI_ISL_428853 | 2020-03-30 | IT |
| EPI_ISL_428854 | 2020-03-30 | IT |
| EPI_ISL_428883 | 2020-03-20 | RU |
| EPI_ISL_428888 | 2020-03-20 | RU |
| EPI_ISL_428893 | 2020-03-23 | RU |
| EPI_ISL_428895 | 2020-03-24 | RU |
| EPI_ISL_428897 | 2020-03-24 | RU |
| EPI_ISL_415637 | 2020-03-04 | GB |
| EPI_ISL_425052 | 2020-03-25 | BE |
| EPI_ISL_425059 | 2020-03-24 | BE |
| EPI_ISL_426379 | 2020-03-29 | SI |
| EPI_ISL_428865 | 2020-03-11 | RU |
| EPI_ISL_428958 | 2020-04-07 | LU |
| EPI_ISL_437016 | 2020-03-26 | DK |
| EPI_ISL_437031 | 2020-03-27 | DK |
| EPI_ISL_437089 | 2020-03-23 | LV |
| EPI_ISL_437092 | 2020-03-20 | LV |
| EPI_ISL_437093 | 2020-03-22 | LV |
| EPI_ISL_437094 | 2020-03-23 | LV |
| EPI_ISL_437095 | 2020-03-23 | LV |
| EPI_ISL_437096 | 2020-03-23 | LV |
| EPI_ISL_413019 | 2020-02-26 | CH |
| EPI_ISL_413022 | 2020-02-29 | CH |
| EPI_ISL_426358 | 2020-03-19 | CZ |
| EPI_ISL_426359 | 2020-03-17 | CZ |
| EPI_ISL_428925 | 2020-03-28 | PL |
| EPI_ISL_428926 | 2020-03-28 | PL |
| EPI_ISL_428927 | 2020-03-28 | PL |
| EPI_ISL_428928 | 2020-03-30 | PL |
| EPI_ISL_428930 | 2020-03-29 | PL |
| EPI_ISL_428931 | 2020-03-28 | PL |
| EPI_ISL_428932 | 2020-03-28 | PL |
| EPI_ISL_429116 | 2020-03-15 | SE |
| EPI_ISL_429120 | 2020-03-11 | SE |
| EPI_ISL_429136 | 2020-03-04 | SE |
| EPI_ISL_430100 | 2020-04-14 | RU |
| EPI_ISL_430110 | 2020-04-15 | RU |
| EPI_ISL_430111 | 2020-04-15 | RU |
| EPI_ISL_418402 | 2020-03-14 | FI |
| EPI_ISL_418403 | 2020-03-14 | FI |
| EPI_ISL_418404 | 2020-03-14 | FI |
| EPI_ISL_418405 | 2020-03-14 | FI |
| EPI_ISL_418406 | 2020-03-14 | FI |
| EPI_ISL_418407 | 2020-03-14 | FI |
| EPI_ISL_418409 | 2020-03-14 | FI |
| EPI_ISL_418432 | 2020-03-18 | FR |
| EPI_ISL_418580 | 2020-03-08 | IE |
| EPI_ISL_418581 | 2020-03-08 | IE |
| EPI_ISL_418582 | 2020-03-10 | IE |
| EPI_ISL_418583 | 2020-03-10 | IE |
| EPI_ISL_420899 | 2020-03-11 | DE |
| EPI_ISL_429230 | 2020-03-24 | IT |
| EPI_ISL_429231 | 2020-03-24 | IT |
| EPI_ISL_429232 | 2020-03-24 | IT |
| EPI_ISL_429233 | 2020-03-24 | IT |
| EPI_ISL_429234 | 2020-03-24 | IT |
| EPI_ISL_429235 | 2020-03-24 | IT |
| EPI_ISL_429236 | 2020-03-28 | IT |
| EPI_ISL_430076 | 2020-04-10 | RU |
| EPI_ISL_430084 | 2020-04-09 | RU |
| EPI_ISL_430087 | 2020-04-10 | RU |
| EPI_ISL_430090 | 2020-04-10 | RU |
| EPI_ISL_430092 | 2020-04-14 | RU |
| EPI_ISL_430095 | 2020-04-14 | RU |
| EPI_ISL_418516 | 2020-03-06 | IE |
| EPI_ISL_429213 | 2020-03-16 | CH |
| EPI_ISL_429286 | 2020-03-11 | DK |
| EPI_ISL_429288 | 2020-03-11 | DK |
| EPI_ISL_429295 | 2020-03-13 | DK |
| EPI_ISL_429297 | 2020-03-14 | DK |
| EPI_ISL_432805 | 2020-04-02 | GB |
| EPI_ISL_406597 | 2020-01-23 | FR |
| EPI_ISL_418548 | 2020-03-06 | IE |
| EPI_ISL_419562 | 2020-02-29 | LU |
| EPI_ISL_429199 | 2020-03-22 | CH |
| EPI_ISL_429200 | 2020-03-19 | CH |
| EPI_ISL_429207 | 2020-04-03 | CH |
| EPI_ISL_429220 | 2020-04-06 | CH |
| EPI_ISL_429226 | 2020-03-17 | IT |
| EPI_ISL_429227 | 2020-03-17 | IT |
| EPI_ISL_429228 | 2020-03-20 | IT |
| EPI_ISL_429229 | 2020-03-21 | IT |
| EPI_ISL_418228 | 2020-03-12 | FR |
| EPI_ISL_418247 | 2020-02-26 | ES |
| EPI_ISL_418255 | 2020-03-14 | IT |
| EPI_ISL_418256 | 2020-03-14 | IT |
| EPI_ISL_418257 | 2020-03-17 | IT |
| EPI_ISL_418258 | 2020-03-14 | IT |
| EPI_ISL_418259 | 2020-03-14 | IT |
| EPI_ISL_418260 | 2020-03-16 | IT |
| EPI_ISL_418261 | 2020-03-17 | IT |
| EPI_ISL_418263 | 2020-03-18 | GR |
| EPI_ISL_418264 | 2020-03-18 | GR |
| EPI_ISL_418265 | 2020-03-18 | GR |
| EPI_ISL_418277 | 2020-03-03 | CH |
| EPI_ISL_419571 | 2020-03-06 | LU |
| EPI_ISL_419572 | 2020-03-10 | LU |
| EPI_ISL_419576 | 2020-03-17 | LU |
| EPI_ISL_419579 | 2020-03-14 | LU |
| EPI_ISL_419580 | 2020-03-12 | LU |
| EPI_ISL_420541 | 2020-03-05 | SI |
| EPI_ISL_420563 | 2020-03-18 | IT |
| EPI_ISL_420564 | 2020-03-19 | IT |
| EPI_ISL_420565 | 2020-03-19 | IT |
| EPI_ISL_420566 | 2020-03-19 | IT |
| EPI_ISL_420567 | 2020-03-21 | IT |
| EPI_ISL_420568 | 2020-03-23 | IT |
| EPI_ISL_420569 | 2020-03-23 | IT |
| EPI_ISL_420583 | 2020-03-23 | IT |
| EPI_ISL_420592 | 2020-03-23 | IT |
| EPI_ISL_419546 | 2020-03-15 | DE |
| EPI_ISL_417018 | 2020-03-14 | BE |
| EPI_ISL_418183 | 2020-03-17 | HU |
| EPI_ISL_419671 | 2020-03-19 | AT |
| EPI_ISL_419673 | 2020-03-22 | AT |
| EPI_ISL_419674 | 2020-03-24 | AT |
| EPI_ISL_419686 | 2020-03-09 | ES |
| EPI_ISL_418386 | 2020-03-13 | FI |
| EPI_ISL_418387 | 2020-03-13 | FI |
| EPI_ISL_418388 | 2020-03-13 | FI |
| EPI_ISL_418389 | 2020-03-13 | FI |
| EPI_ISL_418390 | 2020-03-13 | FI |
| EPI_ISL_418392 | 2020-03-13 | FI |
| EPI_ISL_418398 | 2020-03-13 | FI |
| EPI_ISL_419654 | 2020-03-03 | AT |
| EPI_ISL_419655 | 2020-02-26 | AT |
| EPI_ISL_419656 | 2020-02-26 | AT |
| EPI_ISL_419659 | 2020-03-10 | AT |
| EPI_ISL_419660 | 2020-03-13 | AT |
| EPI_ISL_419661 | 2020-03-10 | AT |
| EPI_ISL_419662 | 2020-03-14 | AT |
| EPI_ISL_419663 | 2020-03-15 | AT |
| EPI_ISL_419664 | 2020-03-23 | AT |
| EPI_ISL_419666 | 2020-03-11 | AT |
| EPI_ISL_419667 | 2020-03-13 | AT |
| EPI_ISL_420619 | 2020-03-23 | FR |
| EPI_ISL_417538 | 2020-03-17 | IS |
| EPI_ISL_428209 | 2020-04-06 | PL |
| EPI_ISL_429535 | 2020-03-25 | DK |
| EPI_ISL_429537 | 2020-03-24 | DK |
| EPI_ISL_406800 | 2020-01-01 | CN |
| EPI_ISL_406862 | 2020-01-28 | DE |
| EPI_ISL_418805 | 2020-03-06 | BE |
| EPI_ISL_418806 | 2020-03-05 | BE |
| EPI_ISL_428232 | 2020-03-18 | PL |
| EPI_ISL_428233 | 2020-03-18 | PL |
| EPI_ISL_428234 | 2020-03-19 | PL |
| EPI_ISL_428235 | 2020-03-23 | PL |
| EPI_ISL_428236 | 2020-03-27 | PL |
| EPI_ISL_429561 | 2020-03-25 | DK |
| EPI_ISL_429583 | 2020-03-23 | DK |
| EPI_ISL_416327 | 2020-01-28 | CN |
| EPI_ISL_416334 | 2020-02-06 | CN |
| EPI_ISL_417663 | 2020-03-14 | IS |
| EPI_ISL_417688 | 2020-03-01 | IS |
| EPI_ISL_418989 | 2020-03-04 | BE |
| EPI_ISL_416386 | 2020-01-31 | CN |
| EPI_ISL_427043 | 2020-03-18 | GR |
| EPI_ISL_428346 | 2020-04-17 | TR |
| EPI_ISL_428366 | 2020-03-30 | FR |
| EPI_ISL_428368 | 2020-04-16 | TR |
| EPI_ISL_417623 | 2020-03-18 | IS |
| EPI_ISL_428354 | 2020-03-25 | FR |
| EPI_ISL_429370 | 2020-03-09 | DK |
| EPI_ISL_418627 | 2020-03-14 | BE |
| EPI_ISL_418629 | 2020-03-17 | BE |
| EPI_ISL_418633 | 2020-03-17 | BE |
| EPI_ISL_418665 | 2020-03-22 | BE |
| EPI_ISL_429335 | 2020-03-02 | DK |
| EPI_ISL_429339 | 2020-03-07 | DK |
| EPI_ISL_417419 | 2020-03-01 | IT |
| EPI_ISL_417421 | 2020-03-01 | IT |
| EPI_ISL_417423 | 2020-03-01 | IT |
| EPI_ISL_417491 | 2020-03-03 | IT |
| EPI_ISL_429321 | 2020-03-16 | DK |
| EPI_ISL_429328 | 2020-03-15 | DK |
| EPI_ISL_429416 | 2020-03-10 | DK |
| EPI_ISL_430469 | 2020-02-29 | GR |
| EPI_ISL_406798 | 2019-12-26 | CN |
| EPI_ISL_416143 | 2020-02-28 | DK |
| EPI_ISL_417418 | 2020-03-01 | IT |
| EPI_ISL_417432 | 2020-03-08 | IE |
| EPI_ISL_417445 | 2020-02-24 | IT |
| EPI_ISL_417446 | 2020-02-24 | IT |
| EPI_ISL_417447 | 2020-02-24 | IT |
| EPI_ISL_417485 | 2020-03-02 | NO |
| EPI_ISL_417486 | 2020-03-01 | NO |
| EPI_ISL_429452 | 2020-03-10 | DK |
| EPI_ISL_410546 | 2020-01-29 | IT |
| EPI_ISL_421202 | 2020-03-30 | BE |
| EPI_ISL_433177 | 2020-04-19 | GB |
| EPI_ISL_434509 | 2020-04-10 | LU |
| EPI_ISL_410486 | 2020-02-08 | FR |
| EPI_ISL_411951 | 2020-02-07 | SE |
| EPI_ISL_421171 | 2020-03-05 | ES |
| EPI_ISL_421175 | 2020-03-29 | ES |
| EPI_ISL_422437 | 2020-03-25 | IT |
| EPI_ISL_422438 | 2020-03-25 | IT |
| EPI_ISL_422631 | 2020-03-31 | NL |
| EPI_ISL_434455 | 2020-03-09 | GR |
| EPI_ISL_434456 | 2020-03-22 | GR |
| EPI_ISL_434457 | 2020-03-28 | GR |
| EPI_ISL_434459 | 2020-03-29 | GR |
| EPI_ISL_434460 | 2020-03-23 | GR |
| EPI_ISL_434461 | 2020-03-29 | GR |
| EPI_ISL_434464 | 2020-03-16 | GR |
| EPI_ISL_434467 | 2020-03-12 | GR |
| EPI_ISL_434468 | 2020-03-26 | GR |
| EPI_ISL_434469 | 2020-03-20 | GR |
| EPI_ISL_434471 | 2020-03-11 | GR |
| EPI_ISL_434473 | 2020-03-11 | GR |
| EPI_ISL_434474 | 2020-03-11 | GR |
| EPI_ISL_434480 | 2020-03-12 | GR |
| EPI_ISL_434484 | 2020-03-09 | GR |
| EPI_ISL_434487 | 2020-04-13 | LU |
| EPI_ISL_434488 | 2020-04-21 | LU |
| EPI_ISL_422612 | 2020-04-01 | NL |
| EPI_ISL_422636 | 2020-03-08 | CZ |
| EPI_ISL_423953 | 2020-03-18 | GB |
| EPI_ISL_434631 | 2020-04-08 | FR |
| EPI_ISL_434653 | 2020-03-24 | SE |
| EPI_ISL_421275 | 2020-03-18 | RU |
| EPI_ISL_422568 | 2020-03-28 | NL |
| EPI_ISL_423892 | 2020-03-17 | GB |
| EPI_ISL_434572 | 2020-04-14 | CZ |
| EPI_ISL_412912 | 2020-02-25 | DE |
| EPI_ISL_412971 | 2020-02-25 | FI |
| EPI_ISL_412973 | 2020-02-20 | IT |
| EPI_ISL_412974 | 2020-01-29 | IT |
| EPI_ISL_422266 | 2020-03-25 | GB |
| EPI_ISL_423662 | 2020-02-23 | GB |
| EPI_ISL_436980 | 2020-03-30 | DK |
| EPI_ISL_433016 | 2020-04-02 | GB |
| EPI_ISL_434366 | 2020-03-30 | BE |
| EPI_ISL_436999 | 2020-03-25 | DK |
| EPI_ISL_418000 | 2020-03-10 | PT |
| EPI_ISL_418006 | 2020-03-13 | PT |
| EPI_ISL_421653 | 2020-03-25 | LV |
| EPI_ISL_421654 | 2020-03-25 | LV |
| EPI_ISL_421655 | 2020-03-25 | LV |
| EPI_ISL_421656 | 2020-03-25 | LV |
| EPI_ISL_433639 | 2020-04-03 | GB |
| EPI_ISL_434358 | 2020-04-13 | BE |
| EPI_ISL_418021 | 2020-03-16 | PT |
| EPI_ISL_418027 | 2020-03-17 | PT |
| EPI_ISL_419386 | 2020-03-18 | PT |
| EPI_ISL_419387 | 2020-03-18 | PT |
| EPI_ISL_420312 | 2020-03-18 | NO |
| EPI_ISL_420313 | 2020-03-10 | NO |
| EPI_ISL_420358 | 2020-03-18 | BE |
| EPI_ISL_432332 | 2020-04-08 | GB |
| EPI_ISL_420294 | 2020-03-06 | SI |
| EPI_ISL_420295 | 2020-03-24 | SI |
| EPI_ISL_422906 | 2020-03-16 | NL |
| EPI_ISL_422922 | 2020-03-23 | NL |
| EPI_ISL_422926 | 2020-03-23 | NL |
| EPI_ISL_421743 | 2020-03-17 | LU |
| EPI_ISL_420464 | 2020-03-12 | GB |
| EPI_ISL_432438 | 2020-04-01 | GB |
| EPI_ISL_432446 | 2020-04-01 | GB |
| EPI_ISL_408430 | 2020-01-29 | FR |
| EPI_ISL_420401 | 2020-03-24 | BE |
| EPI_ISL_421735 | 2020-03-17 | LU |
| EPI_ISL_421736 | 2020-03-17 | LU |
| EPI_ISL_422717 | 2020-03-22 | NL |
| EPI_ISL_422731 | 2020-03-23 | NL |
| EPI_ISL_420129 | 2020-03-13 | ES |
| EPI_ISL_420134 | 2020-02-28 | NO |
| EPI_ISL_420135 | 2020-02-28 | NO |
| EPI_ISL_421448 | 2020-03-18 | PT |
| EPI_ISL_421450 | 2020-03-18 | PT |
| EPI_ISL_421456 | 2020-03-19 | PT |
| EPI_ISL_422740 | 2020-03-25 | NL |
| EPI_ISL_422756 | 2020-03-27 | NL |
| EPI_ISL_422793 | 2020-03-30 | NL |
| EPI_ISL_407073 | 2020-01-29 | GB |
| EPI_ISL_422679 | 2020-03-19 | NL |
| EPI_ISL_432000 | 2020-03-30 | GB |
| EPI_ISL_434657 | 2020-04-01 | SE |
| EPI_ISL_434658 | 2020-04-03 | SE |
| EPI_ISL_434659 | 2020-04-06 | SE |
| EPI_ISL_434660 | 2020-04-06 | SE |
| EPI_ISL_434663 | 2020-04-06 | SE |
| EPI_ISL_434664 | 2020-04-06 | SE |
| EPI_ISL_434666 | 2020-04-08 | SE |
| EPI_ISL_407079 | 2020-01-29 | FI |
| EPI_ISL_421507 | 2020-03-23 | FR |
| EPI_ISL_434672 | 2020-04-16 | SE |
| EPI_ISL_434675 | 2020-04-20 | SE |
| EPI_ISL_434676 | 2020-04-20 | SE |
| EPI_ISL_432233 | 2020-04-01 | GB |
| EPI_ISL_419176 | 2020-03-21 | FR |
| EPI_ISL_419187 | 2020-03-22 | FR |
| EPI_ISL_419254 | 2020-03-23 | IT |
| EPI_ISL_419255 | 2020-03-23 | IT |
| EPI_ISL_420136 | 2020-03-04 | NO |
| EPI_ISL_420137 | 2020-03-08 | NO |
| EPI_ISL_420138 | 2020-03-05 | NO |
| EPI_ISL_420139 | 2020-03-05 | NO |
| EPI_ISL_420141 | 2020-03-10 | NO |
| EPI_ISL_420143 | 2020-03-10 | NO |
| EPI_ISL_420145 | 2020-03-09 | NO |
| EPI_ISL_420146 | 2020-03-11 | NO |
| EPI_ISL_420147 | 2020-03-10 | NO |
| EPI_ISL_420148 | 2020-03-14 | NO |
| EPI_ISL_420150 | 2020-03-09 | NO |
| EPI_ISL_420151 | 2020-03-17 | NO |
| EPI_ISL_420152 | 2020-03-17 | NO |
| EPI_ISL_420153 | 2020-03-16 | NO |
| EPI_ISL_421467 | 2020-03-20 | PT |
| EPI_ISL_421471 | 2020-03-21 | PT |
| EPI_ISL_421472 | 2020-03-21 | PT |
| EPI_ISL_421474 | 2020-03-21 | PT |
| EPI_ISL_421477 | 2020-03-21 | PT |
| EPI_ISL_421482 | 2020-03-18 | PT |
| EPI_ISL_419173 | 2020-03-21 | FR |
| EPI_ISL_421492 | 2020-03-22 | PT |
| EPI_ISL_421493 | 2020-03-21 | PT |
| EPI_ISL_421494 | 2020-03-20 | PT |
| EPI_ISL_433459 | 2020-04-11 | GB |

AT = Austria, BE = Belgium, CH = Swiss, CN = China, CZ = Czech Republic, DE = Germany, DK = Denmark,
ES = Spain, FI = Finland, FR = France, GB = Great Britain, GR = Greece, HU = Hungary, IE = Ireland, IS = Island
IT = Italy, LU = Luxemburg, LV = Latvia, NL = Nederland, NO = Norway, PL = Poland, PT = Portugal,
RS = Serbia, RU = Russia, SE = Sweden, SI = Slovenia, SK = Slovakia, TU = Turkey.
