# Supplementary material for: Molecular Tracing of SARS-CoV-2 in Italy in the First Three Months of the Epidemic
Source: Preprints.org preprint supplement (doi:10.20944/preprints202007.0144.v1), 2020-07-08
Supplement: Supplementary file 2 [file Table S1.docx]

Table S1. Data of Italian Patients characterized in the present study.
